# Supplementary material for: Molecular Architecture of Early Dissemination and Massive Second Wave of the SARS-CoV-2 Virus in a Major Metropolitan Area
Source: PubMed Central journal article supplement — medRxiv. 2020 Sep 29:2020.09.22.20199125. Preprint. [Version 3] doi: 10.1101/2020.09.22.20199125 (PMC7536878; doi:10.1101/2020.09.22.20199125), 2020-09-29
Supplement: media-1.pdf [file media-1.pdf]

**Supplemental Table 3.** Pearson Correlation Coefficients for Outcomes.

| Category     | Class                        | Deceased <sup>a</sup> | LengthOfStay <sup>b</sup> | IMU_LOS <sup>b</sup> | ICU_LOS <sup>b</sup> | MechVentilation <sup>b</sup> | SupplOxygen <sup>b</sup> |
|--------------|------------------------------|-----------------------|---------------------------|----------------------|----------------------|------------------------------|--------------------------|
| Sex          | M                            | 0.05                  | 0.06                      | 0.08                 | 0.07                 | 0.05                         | 0.04                     |
|              | F                            | -0.05                 | -0.06                     | -0.08                | -0.07                | -0.05                        | -0.04                    |
| ABO          | A                            | -0.01                 | -0.02                     | 0.02                 | -0.06                | -0.05                        | -0.01                    |
|              | B                            | -0.04                 | -0.04                     | -0.02                | -0.03                | -0.04                        | 0.02                     |
|              | AB                           | -0.01                 | 0.00                      | -0.03                | -0.03                | 0.04                         | -0.05                    |
|              | O                            | 0.05                  | 0.05                      | 0.00                 | 0.09                 | 0.06                         | 0.02                     |
| Rh factor    | Positive                     | 0.03                  | 0.00                      | -0.02                | 0.06                 | 0.05                         | -0.03                    |
|              | Negative                     | -0.03                 | 0.00                      | 0.02                 | -0.06                | -0.05                        | 0.03                     |
| Age          | AGE                          | 0.27                  | 0.20                      | 0.06                 | 0.04                 | 0.05                         | 0.15                     |
| Ethnicity    | Asian                        | 0.01                  | -0.06                     | -0.02                | -0.01                | -0.01                        | -0.03                    |
|              | Black                        | -0.03                 | -0.04                     | -0.03                | -0.03                | 0.01                         | -0.10                    |
|              | Caucasian                    | 0.02                  | 0.05                      | 0.05                 | 0.04                 | -0.01                        | 0.08                     |
|              | Hispanic                     | 0.03                  | 0.00                      | -0.01                | 0.02                 | -0.01                        | 0.03                     |
|              | Hawaiian/Pacific<br>Islander | -0.02                 | 0.07                      | 0.01                 | 0.00                 | 0.02                         | 0.12                     |
|              | Native American              | -0.01                 | 0.01                      | -0.03                | -0.03                | -0.03                        | 0.04                     |
| Ethnic Group | Hispanic or<br>Latino        | -0.01                 | 0.00                      | 0.00                 | 0.06                 | 0.00                         | 0.07                     |
|              | Not Hispanic or<br>Latino    | 0.01                  | 0.00                      | 0.00                 | -0.06                | 0.00                         | -0.07                    |
| Wave         | Wave1                        | 0.08                  | 0.18                      | -0.06                | 0.14                 | 0.20                         | -0.13                    |
|              | Wave2                        | -0.08                 | -0.18                     | 0.06                 | -0.14                | -0.20                        | 0.13                     |
| A23403G      | D614                         | 0.01                  | 0.06                      | -0.05                | 0.01                 | 0.05                         | -0.06                    |
|              | G614                         | -0.01                 | -0.06                     | 0.05                 | -0.01                | -0.05                        | 0.06                     |

<sup>a</sup>yes versus no

<sup>b</sup>days (LOS, length of stay)
