# Supplementary material for: Molecular Architecture of Early Dissemination and Massive Second Wave of the SARS-CoV-2 Virus in a Major Metropolitan Area
Source: PubMed Central journal article supplement — medRxiv. 2020 Sep 29:2020.09.22.20199125. Preprint. [Version 3] doi: 10.1101/2020.09.22.20199125 (PMC7536878; doi:10.1101/2020.09.22.20199125), 2020-09-29
Supplement: media-2.pdf [file media-2.pdf]

**Supplemental Table 4A.** Oligonucleotides used in this study.

| <b>Primer Name</b>      | <b>Sequence</b>                   |
|-------------------------|-----------------------------------|
| JK126_EcoRI_universal-F | aggcaacttcaagaacctgagagaattc      |
| JK128_D614G-F-gib       | Tgctgtaccaaggtgttaactgcac         |
| JK129_D614G-R-gib       | Gtgcagttaacaccttggtacagca         |
| JK130_NheI_universal-R  | Gtaggcgatgatgctctggctagc          |
| JK131_A352S-F-gib       | tgccctccgtttactcctggaatagaaag     |
| JK132_A352S-R-gib       | ctttctattccaggagtaaaccggaggca     |
| JK133_A419V-F-gib       | cagaccggtaagatcgttgactacaactataa  |
| JK134_A419V-R-gib       | ttatagttgtagtcaacgatcttaccggctctg |
| JK135_A520S-F-gib       | Ttactccactcccccgccac              |
| JK136_A520S-R-gib       | Gtggcgggggagtgagtaa               |
| JK137_A522V-F-gib       | Cacgcccccgtcaccgtctg              |
| JK138_A522V-R-gib       | Cagacggtgacgggggcgtg              |
| JK139_E484Q-F-gib       | Aacggggtgcaaggcttcaac             |
| JK140_E484Q-R-gib       | Gttgaagccttgcaccccggt             |
| JK141_F338L-F-gib       | Ctctgccccctcggcgaggt              |
| JK142_F338L-R-gib       | Acctcgccgagggggcagag              |
| JK143_F456L-F-gib       | Taccggctgcttcgcaagtc              |
| JK144_F456L-R-gib       | Gacttgccaagcagccggta              |
| JK145_G446V-F-gib       | Atagcaaggtggtcggcaactaca          |
| JK146_G446V-R-gib       | Tgtagttgccgaccaccttgctat          |
| JK147_K528R-F-gib       | Ctgcggtcctaggaagtccacc            |
| JK148_K528R-R-gib       | Ggtggacttcttaggaccgcag            |
| JK149_R408T-F-gib       | Cgatgaggtgacgcagatcgca            |
| JK150_R408T-R-gib       | Tgcgatctgcgtcacctcatcg            |
| JK151_S373P-F-gib       | Aacagcgccccctttcagcac             |
| JK152_S373P-R-gib       | Gtgctgaaagggcgctggt               |
| JK153_T385I-F-gib       | Ggcgtttccccaataaagctgaatga        |

|                   |                            |
|-------------------|----------------------------|
| JK154_T385I-R-gib | Tcattcagctttattggggaaacgcc |
| JK155_V445F-F-gib | Ggatagcaagttcggcggaac      |
| JK156_V445F-R-gib | Gttgccgccgaacttgctatcc     |

**Supplemental Table 4B.** Plasmids used in this study.

| <b>Plasmid Name</b> | <b>Spike Mutations</b>                              | <b>Reference</b> |
|---------------------|-----------------------------------------------------|------------------|
| pIF637              | F817P, A892P, A899P, A942P, K986P, V987P<br>(or 6P) | PMC7402631       |
| pIF638              | 6P, D614G                                           | This study       |
| pIF639              | 6P, D614G, F338L                                    | This study       |
| pIF640              | 6P, D614G, A352S                                    | This study       |
| pIF641              | 6P, D614G, T385I                                    | This study       |
| pIF642              | 6P, D614G, A419V                                    | This study       |
| pIF643              | 6P, D614G, V445F                                    | This study       |
| pIF644              | 6P, D614G, G446V                                    | This study       |
| pIF645              | 6P, D614G, F456L                                    | This study       |
| pIF646              | 6P, D614G, E484Q                                    | This study       |
| pIF647              | 6P, D614G, A520S                                    | This study       |
| pIF648              | 6P, D614G, A522V                                    | This study       |
| pIF649              | 6P, D614G, K528R                                    | This study       |
| pIF650              | 6P, D614G, S373P                                    | This study       |
| pIF651              | 6P, D614G, R408T                                    | This study       |

**Supplemental Table 4C.** Summary of spike biophysical parameters.

|                  | <b>T<sub>m</sub>*</b> | <b>ACE2 EC<sub>50</sub>*</b><br><b>(mean±SEM)</b> | <b>CR3022 EC<sub>50</sub>*</b><br><b>(mean±SEM)</b> |
|------------------|-----------------------|---------------------------------------------------|-----------------------------------------------------|
| 6P               | 47.4                  | 8.9 ± 1.9                                         | 7.3 ± 1.9                                           |
| 6P, D614G        | 47.9                  | 5.0 ± 0.4                                         | 5.9 ± 1.2                                           |
| 6P, D614G, F338L | 46.8                  | 4.5 ± 0.6                                         | 16 ± 6.6                                            |
| 6P, D614G, A352S | 45.7                  | 4.4 ± 0.3                                         | 4.3 ± 1.1                                           |
| 6P, D614G, T385I | 46.8                  | 4.8 ± 0.7                                         | 5.2 ± 1.4                                           |
| 6P, D614G, V445F | 45.7                  | 4.2 ± 0.7                                         | 5.4 ± 1.1                                           |
| 6P, D614G, G446V | 44.5                  | 4.0 ± 0.6                                         | 3.3 ± 0.5                                           |
| 6P, D614G, F456L | 46.2                  | 3.8 ± 0.2                                         | 4.0 ± 0.6                                           |
| 6P, D614G, E484Q | 46.2                  | 4.0 ± 0.5                                         | 4.0 ± 0.7                                           |
| 6P, D614G, A520S | 46.8                  | 3.8 ± 0.4                                         | 2.4 ± 0.3                                           |
| 6P, D614G, K528R | 47.4                  | 5.4 ± 0.4                                         | 3.6 ± 0.6                                           |
| 6P, D614G, S373P | 46.8                  | 3.8 ± 0.5                                         | >70                                                 |
| 6P, D614G, R408T | 46.8                  | 8.2 ± 1.3                                         | 10 ± 2.2                                            |

\*Three biological replicates
