# Supplementary material for: Molecular Architecture of Early Dissemination and Massive Second Wave of the SARS-CoV-2 Virus in a Major Metropolitan Area
Source: PubMed Central journal article supplement — medRxiv. 2020 Sep 29:2020.09.22.20199125. Preprint. [Version 3] doi: 10.1101/2020.09.22.20199125 (PMC7536878; doi:10.1101/2020.09.22.20199125), 2020-09-29
Supplement: media-8.pdf [file media-8.pdf]

3 **Supplemental Table 2.** Classifier accuracy scores and performance information.

4

| Model                    | Classification (F1 Scores) |              |               | Regression (R <sup>2</sup> Scores) |              |               |
|--------------------------|----------------------------|--------------|---------------|------------------------------------|--------------|---------------|
|                          | Patient Features           | Genome Kmers | Both Features | Patient Features                   | Genome Kmers | Both Features |
|                          | Score                      | Score        | Score         | Score                              | Score        | Score         |
| Deceased <sup>a</sup>    | 0.53                       | 0.45         | 0.55          | -                                  | -            | -             |
| Length of stay           | -                          | -            | -             | -0.01                              | -0.16        | -0.20         |
| ICU <sup>b</sup>         | 0.60                       | 0.44         | 0.54          | -0.02                              | -0.08        | -0.14         |
| IMU <sup>b</sup>         | 0.505                      | 0.41         | 0.42          | -0.10                              | -0.10        | -0.20         |
| Ventilation <sup>a</sup> | 0.55                       | 0.46         | 0.55          | -0.03                              | -0.11        | -0.14         |
| Oxygen <sup>a</sup>      | 0.53                       | 0.49         | 0.50          | -0.06                              | -0.05        | -0.13         |
| Wave <sup>c</sup>        | 0.54                       | 0.57         | 0.57          | -                                  | -            | -             |

5 <sup>a</sup>yes versus no

6 <sup>b</sup>classification models are based on admitted to unit versus never admitted to unit

7 <sup>c</sup>wave 1 versus wave 2

8
