# Supplementary material for: Molecular Architecture of Early Dissemination and Massive Second Wave of the SARS-CoV-2 Virus in a Major Metropolitan Area
Source: PubMed Central journal article supplement — medRxiv. 2020 Sep 29:2020.09.22.20199125. Preprint. [Version 3] doi: 10.1101/2020.09.22.20199125 (PMC7536878; doi:10.1101/2020.09.22.20199125), 2020-09-29
Supplement: media-9.pdf [file media-9.pdf]

1 **Supplemental Table 1**

|                                         | Wave 1, count (%) | Wave 2, count (%) |
|-----------------------------------------|-------------------|-------------------|
| Number of patients with sequencing data | 844               | 3839              |
| <i>Age (years)</i>                      |                   |                   |
| 0-19                                    | 10 (1.2%)         | 168 (4.4%)        |
| 20-39                                   | 187 (22.2%)       | 1375 (35.8%)      |
| 40-59                                   | 352 (41.7%)       | 1316 (34.3%)      |
| 60-79                                   | 233 (27.6%)       | 819 (21.3%)       |
| 80-99                                   | 62 (7.3%)         | 161 (4.2%)        |
| Average                                 | 53                | 46                |
| <i>Comorbidities</i>                    |                   |                   |
| Unknown                                 | 427 (50.6%)       | 2738 (71.3%)      |
| Obesity-No                              | 261 (62.6%)       | 725 (65.8%)       |
| Obesity-Yes                             | 156 (37.4%)       | 376 (34.2%)       |
| Hypertension-No                         | 183 (43.9%)       | 535 (48.6%)       |
| Hypertension-Yes                        | 234 (56.1%)       | 566 (51.4%)       |
| Diabetes-No                             | 238 (57.1%)       | 624 (56.7%)       |
| Diabetes-Yes                            | 179 (42.9%)       | 477 (43.3%)       |
| COPD-No                                 | 333 (79.9%)       | 935 (84.9%)       |
| COPD-Yes                                | 84 (20.1%)        | 166 (15.1%)       |
| CKD-No                                  | 327 (78.4%)       | 859 (78%)         |
| CKD-Yes                                 | 90 (21.6%)        | 242 (22%)         |
| Hyperlipidemia-No                       | 250 (60%)         | 690 (62.7%)       |
| Hyperlipidemia-Yes                      | 167 (40%)         | 411 (37.3%)       |
| Coronary Disease-No                     | 347 (83.2%)       | 924 (83.9%)       |
| Coronary Disease-Yes                    | 70 (16.8%)        | 177 (16.1%)       |
| <i>Ethnic group</i>                     |                   |                   |
| Hispanic or Latino                      | 215 (25.5%)       | 1408 (36.7%)      |
| Not Hispanic or Latino                  | 573 (67.9%)       | 2080 (54.2%)      |
| Declined                                | 11 (1.3%)         | 44 (1.1%)         |
| Unavailable                             | 45 (5.3%)         | 307 (8%)          |
| <i>Ethnicity</i>                        |                   |                   |
| Caucasian                               | 404 (47.9%)       | 2146 (55.9%)      |

|                                |             |              |
|--------------------------------|-------------|--------------|
| Black                          | 275 (32.6%) | 919 (23.9%)  |
| Asian                          | 83 (9.8%)   | 137 (3.6%)   |
| Other                          | 11 (1.3%)   | 114 (3.0%)   |
| Unavailable                    | 46 (5.5%)   | 318 (8.3%)   |
| Declined                       | 25 (3.0%)   | 205 (5.3%)   |
| <i>Median household income</i> |             |              |
| Number known                   | 800 (94.8%) | 3574 (93.1%) |
| Income                         | \$68,204    | \$65,742     |
| <i>Mortality</i>               |             |              |
| Living                         | 750 (88.9%) | 3466 (90.3%) |
| Deceased                       | 56 (6.6%)   | 124 (3.2%)   |
| Unavailable                    | 38 (4.5%)   | 249 (6.5%)   |
| <i>Highest level of care</i>   |             |              |
| ICU                            | 186 (22%)   | 280 (7.3%)   |
| IMU                            | 7 (0.8%)    | 28 (0.7%)    |
| Inpatient                      | 224 (26.5%) | 793 (20.7%)  |
| Outpatient                     | 389 (46.1%) | 2489 (64.8%) |
| Unknown                        | 38 (4.5%)   | 249 (6.5%)   |
