# Supplementary figures and images for: Molecular Architecture of Early Dissemination and Massive Second Wave of the SARS-CoV-2 Virus in a Major Metropolitan Area
Source: PubMed Central journal article supplement — medRxiv. 2020 Sep 29:2020.09.22.20199125. Preprint. [Version 3] doi: 10.1101/2020.09.22.20199125 (PMC7536878; doi:10.1101/2020.09.22.20199125), 2020-09-29

**A**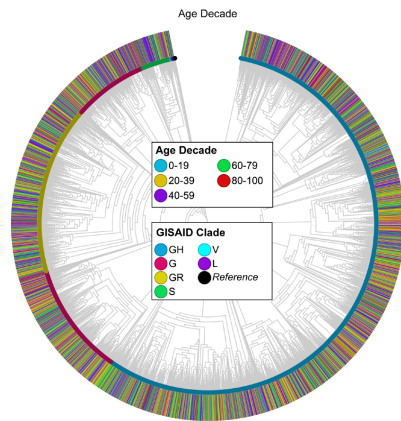**B**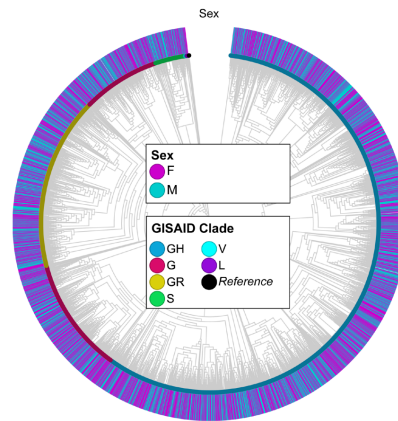**C**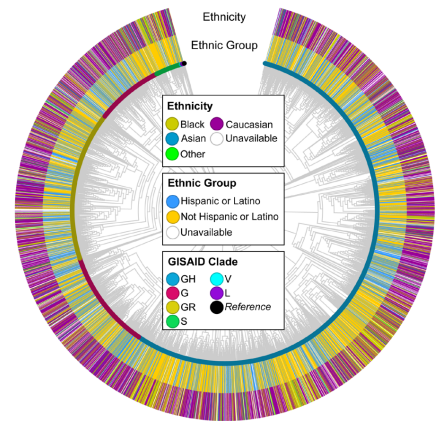**D**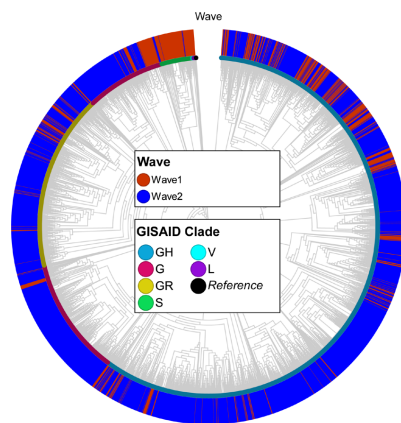**E**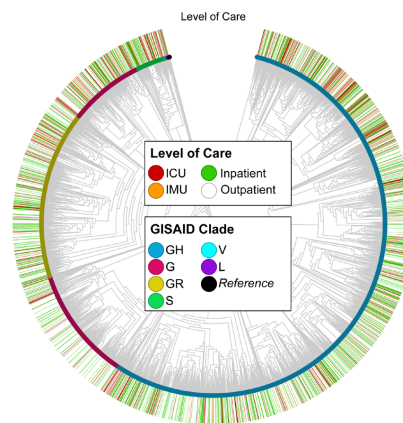**F**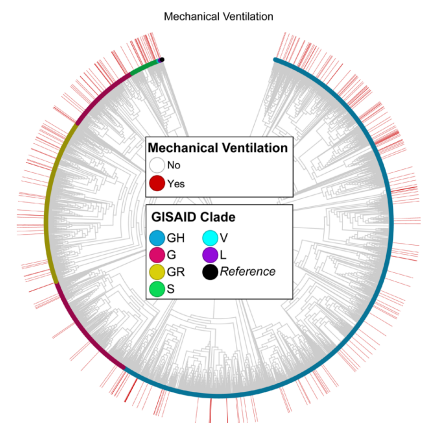**G**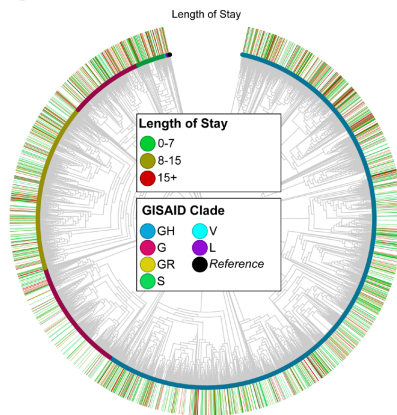**H**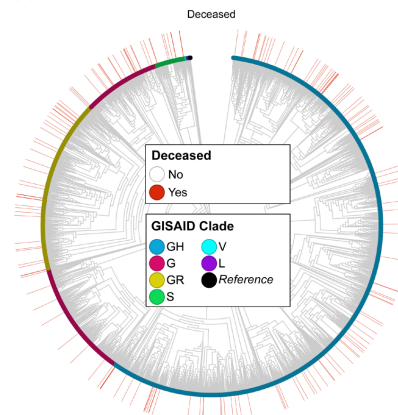

Supplement: media-10.pdf [file media-10.pdf]

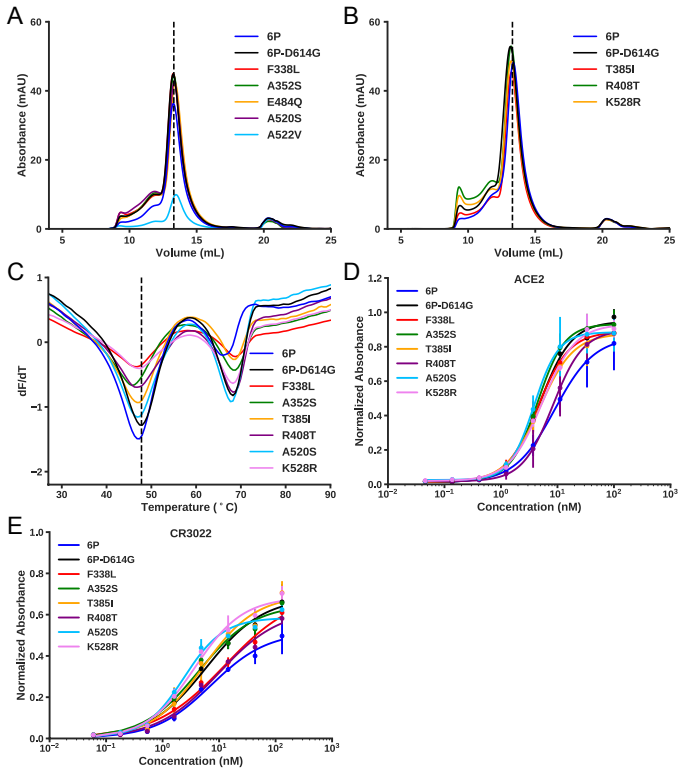

Supplement: media-3.pdf [file media-3.pdf]

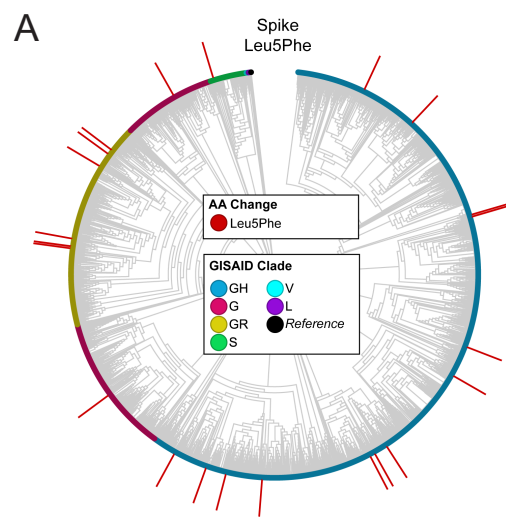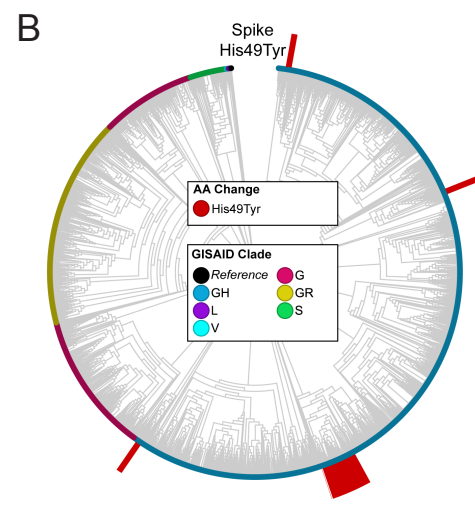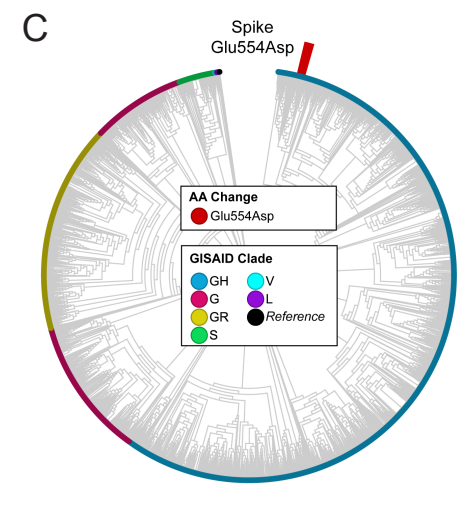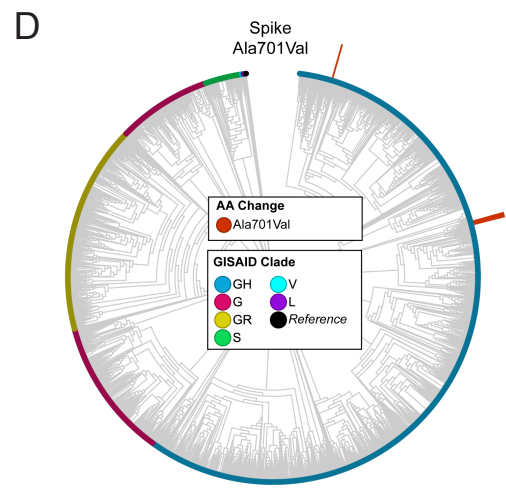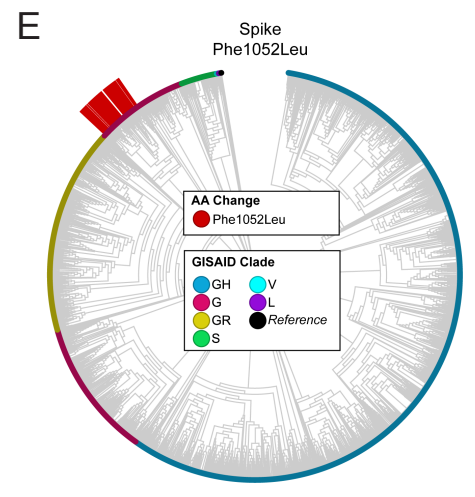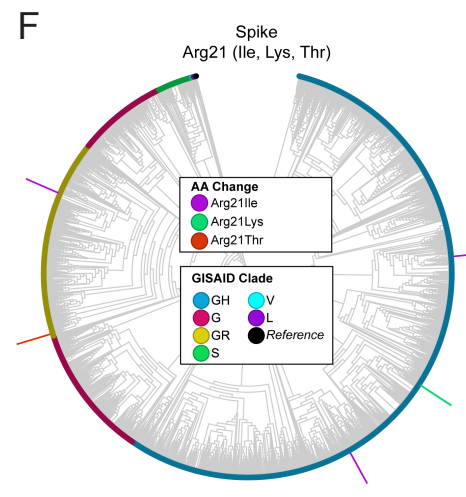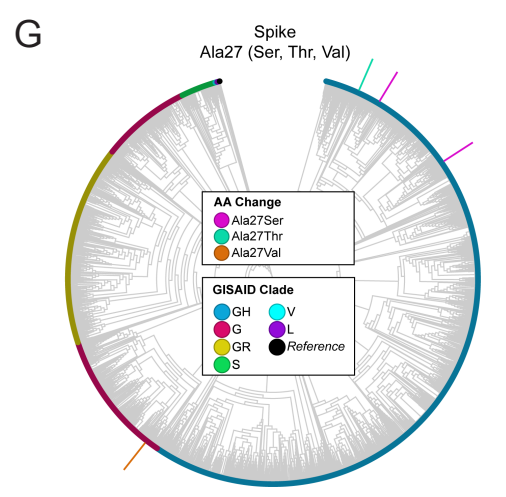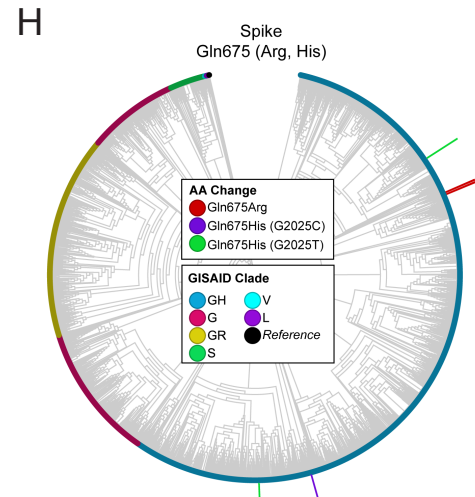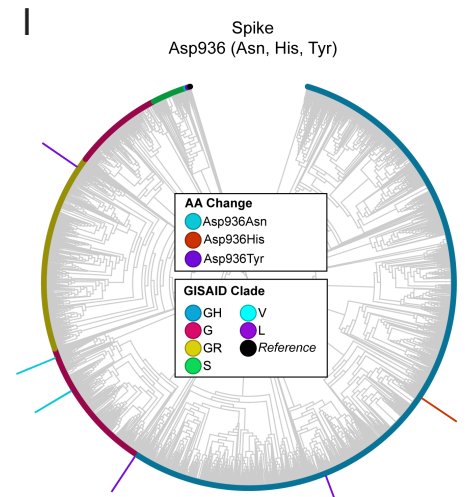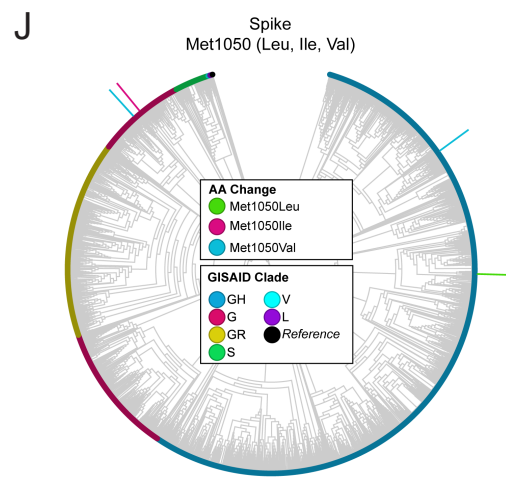

Supplement: media-4.pdf [file media-4.pdf]

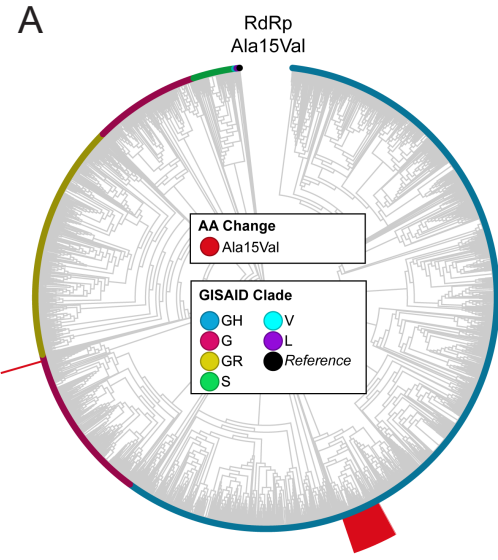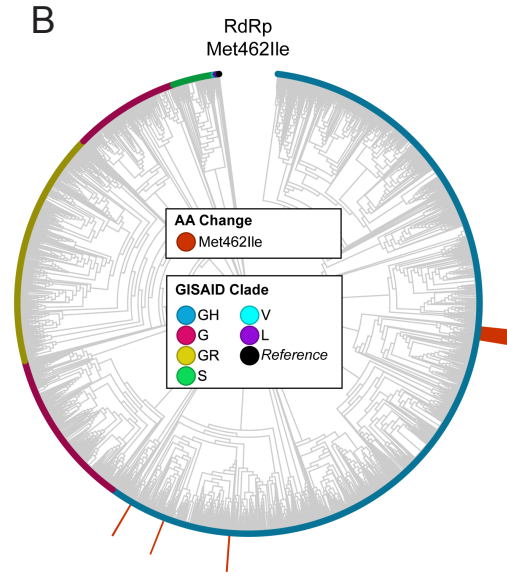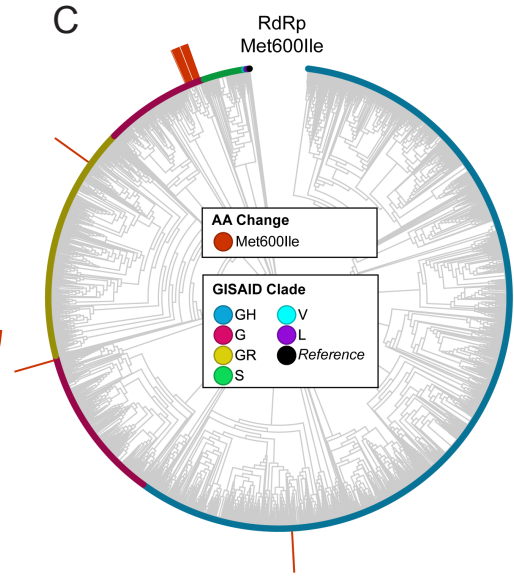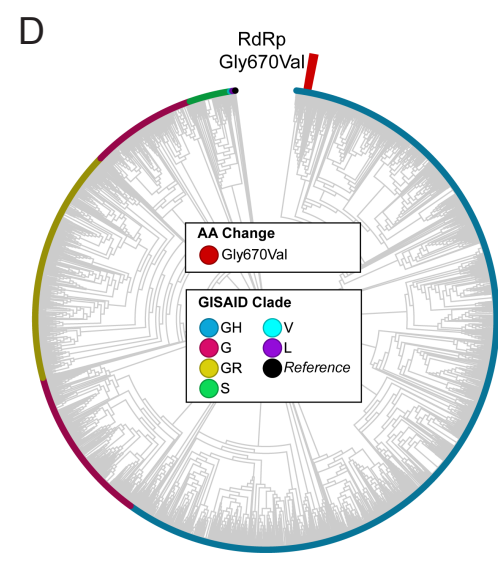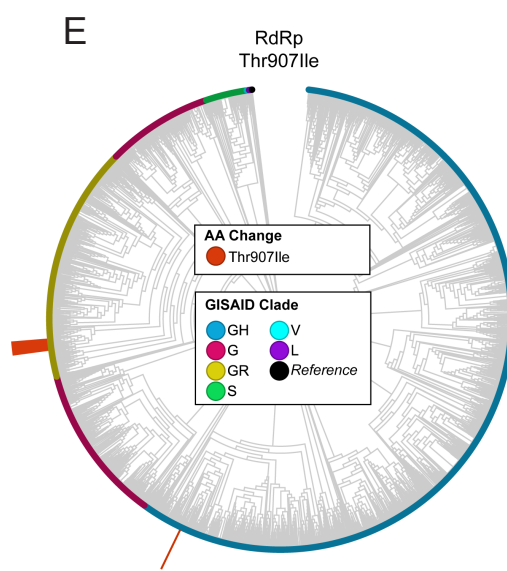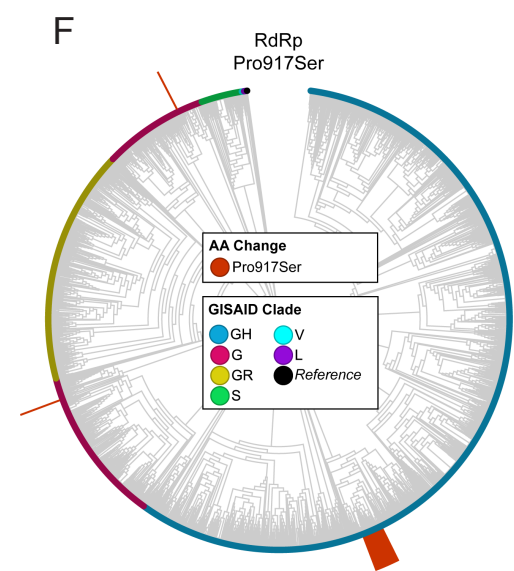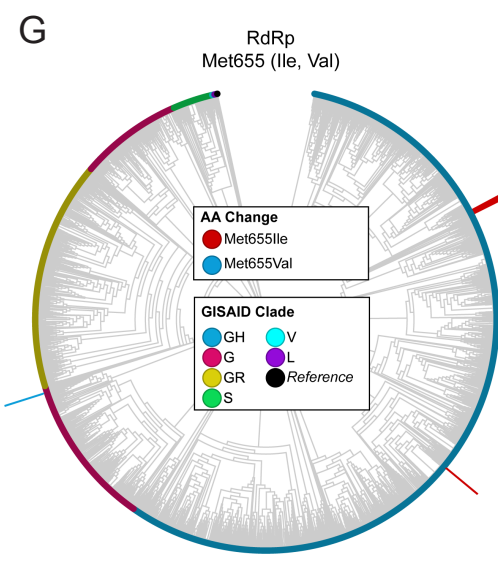

Supplement: media-6.pdf [file media-6.pdf]

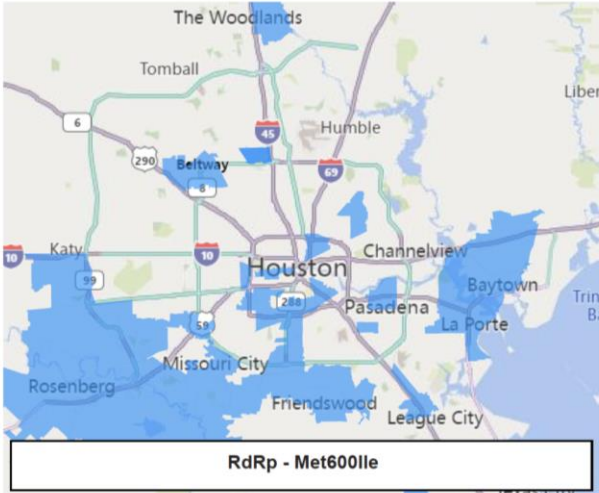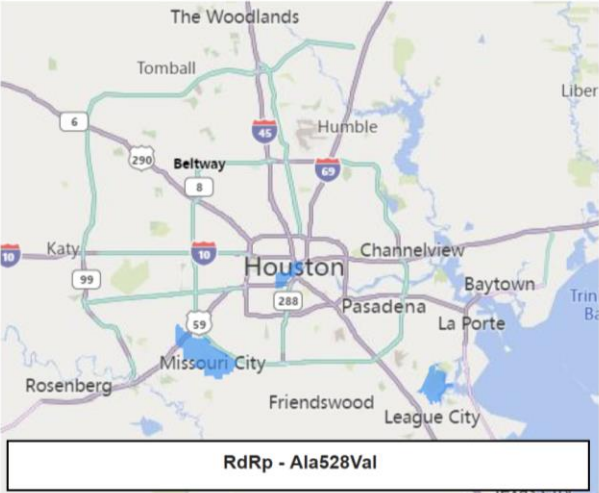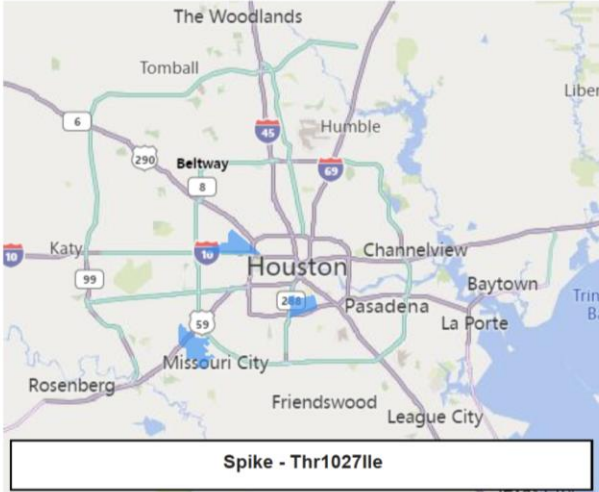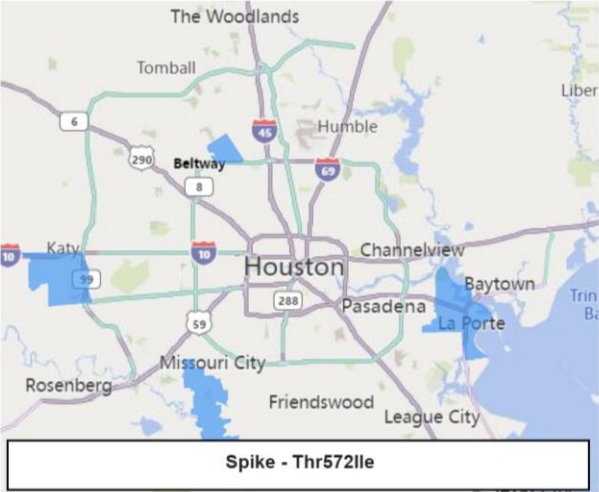

Supplement: media-7.pdf [file media-7.pdf]
